# Supplementary material for: Validity of the Japanese version of health promoting school implementation questionnaire
Source: Research Square preprint supplement (doi:10.21203/rs.3.rs-7945462/v1), 2025-11-11
Supplement: Supplementary file 1 [file 52d2fddac210b2a0b545aef5.docx]

Appendix

| eTable 1. Model fit of the measurement model (CFA) and the structural model (SEM) | | | | | | |
| --- | --- | --- | --- | --- | --- | --- |
| Model | χ² (df) | CFI | TLI | RMSEA | AIC | BIC |
| Initial | 1280.55 (619) | 0.773 | 0.76 | 0.097 | 9934.26 | 10265.34 |
| Final | 1069.62 (604) | 0.84 | 0.82 | 0.083 | 9753.33 | 10125.46 |

| eTable 2. Discriminant validity (Fornell–Larcker matrix: √AVE on diagonal, correlations off-diagonal) | | | | | |
| --- | --- | --- | --- | --- | --- |
| Construct | Adh | Dose | PR | QoD | INT |
| Adh | 0.604 | 0.586 | 0.627 | 0.881 | 0.743 |
| Dose |  | 0.725 | 0.812 | 0.695 | 0.758 |
| PR |  |  | 0.774 | 0.687 | 0.715 |
| QoD |  |  |  | 0.76 | 0.811 |
| INT |  |  |  |  | 0.791 |
